# Supplementary material
Source: PubMed Central journal article supplement (PMC3593876)
Supplement: 1218504110_pnas.201218504SI.pdf [file 1218504110_pnas.201218504SI.pdf]

# Supporting Information

Sjögren et al. 10.1073/pnas.1218504110

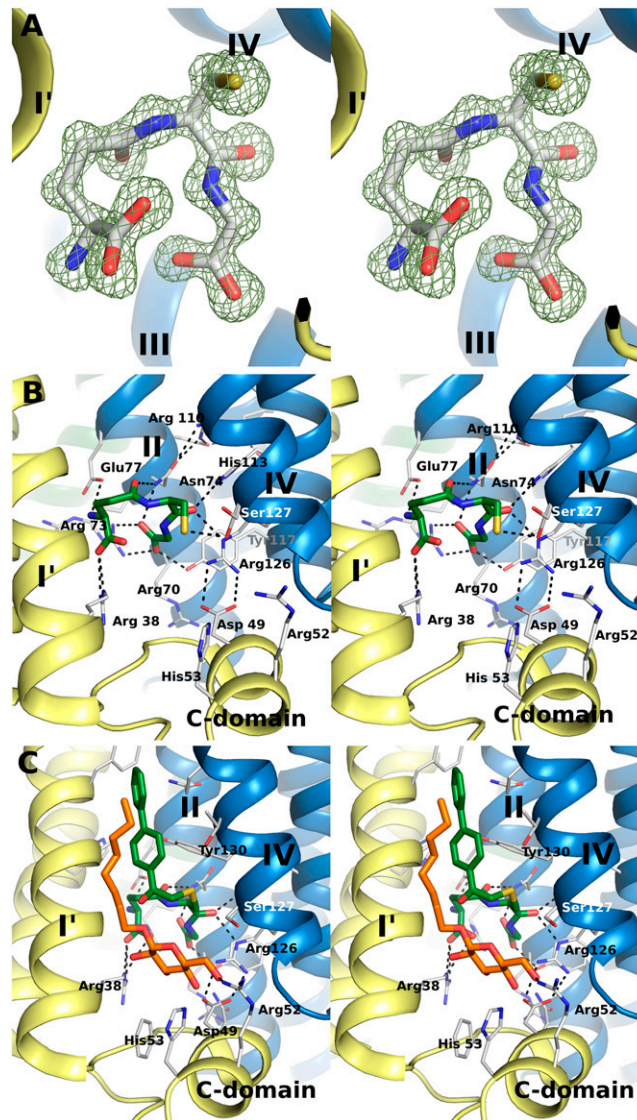

**Fig. S1.** Stereodiagrams of the structure of the active site in microsomal prostaglandin E synthase-1 (mPGES-1) at the monomer interface. (A)  $F_o-F_c$  electron density map for the glutathione (GSH) contoured at  $4\sigma$ . (B) Interactions between mPGES-1 and GSH. The Arg38 side chain originates from the symmetry-related monomer. (C) mPGES-1 in complex with bis-phenyl-GSH. Bis-phenyl-GSH is shown in blue green representation. A  $\beta$ -octyl glucoside (orange stick representation) is bound to the active site. Distances between  $\beta$ -octyl glucoside and mPGES-1 shorter than 3.2 Å are indicated with dashed lines.

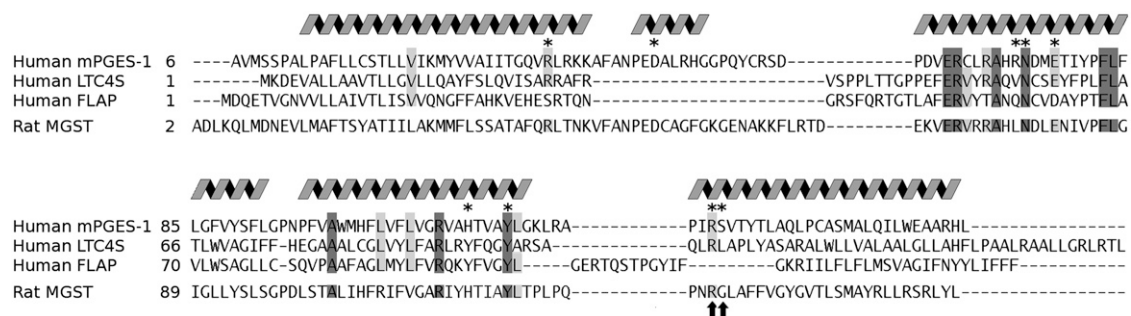

**Fig. S2.** Structure-based sequence alignment of membrane-associated proteins involved in eicosanoid and glutathione metabolism (MAPEG) family members with known X-ray structure. Structures included are human microsomal prostaglandin E synthase-1 (mPGES-1) [Protein Data Bank (PDB) ID code 4AL0, this work], human LTC4 synthase [PDB ID 2UUH (12)], and human 5-lipoxygenase activating protein [FLAP; PDB ID code 2Q7M (10)]. The low-resolution structure of rat microsomal glutathione transferase-1 [MGST1 (13)] could not be aligned to the others and is included as a sequence-based alignment. Residues involved in glutathione interactions in mPGES-1 are indicated with an asterisk. Ser127, Arg126, and Asp49, implicated in catalysis, are marked with arrows.

**Table S1. Data collection and refinement statistics**

|                                                     | Native 2 high resolution           | GSH analog* soak   | Mersalyl acid soak    |
|-----------------------------------------------------|------------------------------------|--------------------|-----------------------|
| <b>Data collection</b>                              |                                    |                    |                       |
| Space group                                         | H3                                 | H3                 | H3                    |
| Cell dimensions                                     |                                    |                    |                       |
| <i>a</i> = <i>b</i> , <i>c</i> (Å)                  | 74.74                              | 77.23              | 76.67                 |
| $\alpha$ = $\beta$ , $\gamma$ (°)                   | 123.40                             | 123.39             | 123.23                |
| Resolution (Å)                                      | 58.5–1.16 (1.23–1.16) <sup>†</sup> | 30–1.95 (2.0–1.95) | 20.5–1.80 (1.84–1.80) |
| <i>R</i> <sub>sym</sub>                             | 3.7 (51.3)                         | 11.9 (48.8)        | 7.3 (27.7)            |
| <i>I</i> / $\sigma$ <i>I</i>                        | 16.9 (1.9)                         | 5.1(1.9)           | 16.6 (5.9)            |
| Completeness (%)                                    | 96.9 (98.5)                        | 100 (100)          | 99.9 (100.0)          |
| Redundancy                                          | 3.1 (3.0)                          | 3.0 (3.0)          | 3.8 (3.8)             |
| <b>Refinement</b>                                   |                                    |                    |                       |
| Resolution (Å)                                      | 58.5–1.16                          | 30–1.95            |                       |
| No. reflections                                     | 89,826                             | 19,681             | 25,046                |
| <i>R</i> <sub>work</sub> / <i>R</i> <sub>free</sub> | 12.2 (13.0)                        | 16.3 (17.3)        |                       |
| No. atoms                                           |                                    |                    |                       |
| Protein                                             | 1,271                              | 1,176              |                       |
| Ligand                                              | 75                                 | 102                |                       |
| Water                                               | 88                                 | 83                 |                       |
| <b>B factors</b>                                    |                                    |                    |                       |
| Protein                                             | 16.9                               | 16.5               |                       |
| Ligand                                              | 32.6                               | 33.1               |                       |
| Water                                               | 32.9                               | 36.0               |                       |
| <b>rmsd</b>                                         |                                    |                    |                       |
| Bond lengths (Å)                                    | 0.012                              | 0.012              |                       |
| Bond angles (°)                                     | 1.26                               | 1.12               |                       |

All datasets were collected from single crystals.

\*1-(4-phenylphenyl)-2-(S-glutathionyl)-ethanone.

<sup>†</sup>Highest resolution shell is shown in parentheses.
